# Supplementary material for: Photo-regulated genetic encoding of dibenzo[c,g][1,2]diazocine on proteins via configuration switching
Source: Royal Society of Chemistry journal article supplement (doi:10.1039/d2cc06738b), 2023-01-01
Supplement: d2cc06738b1.pdf [file d2cc06738b1.pdf]

Supporting Information 2, the underlying raw images of all  
electrophoresis data for

**Photo-regulated genetic encoding of  
dibenzo[*c,g*][1,2]diazocine on Proteins via Configuration  
Switching**

Tingting Zheng, Jieli Fu, Qin Xiong, Xin Shen, Baolin Li, Xiaohu Zhao and Zhipeng

Yu\*

*Key Laboratory of Green Chemistry and Technology of Ministry of Education,*

*College of*

*Chemistry, Sichuan University, 29 Wangjiang Road, Chengdu (610064), P. R. China,*

E-mail: [zhipengy@scu.edu.cn](mailto:zhipengy@scu.edu.cn)

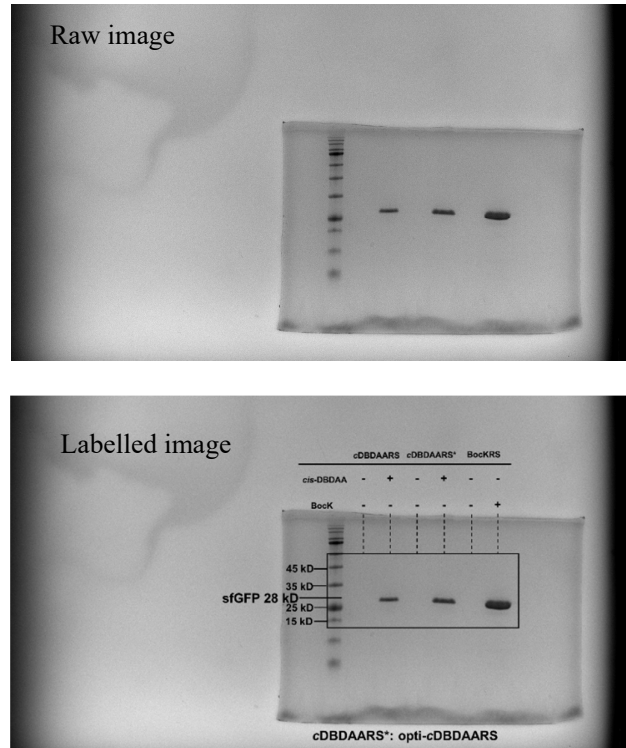

**Figure 1b.** The raw image for the SDS-PAGE analysis of purified sfGFP-Q204TAG expressed with *MmcDBDAARS*, *opti-MmcDBDAARS* or *MmBocKRS* in *E. coil*. Condition: *cis*-DBDAA 2 mM or BocK 2 mM, followed by Coomassie blue staining.

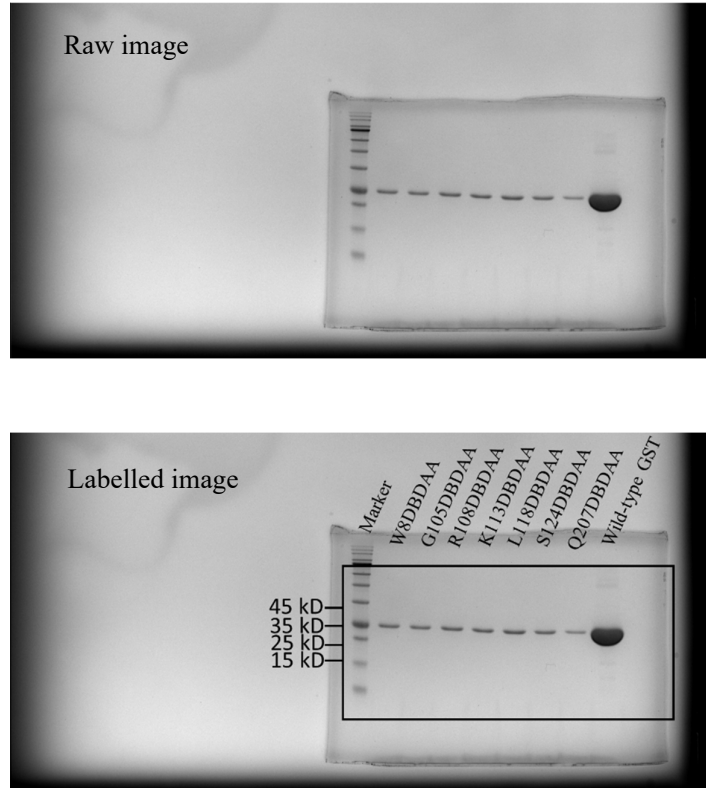

**Figure 3b.** The raw image for the SDS-PAGE analysis of purified *sjGST-XTAGcDBDAA* expressed with *MmcDBDAARS* in *E. coil*. Condition: *cis*-DBDAA 2 mM, followed by Coomassie blue staining.

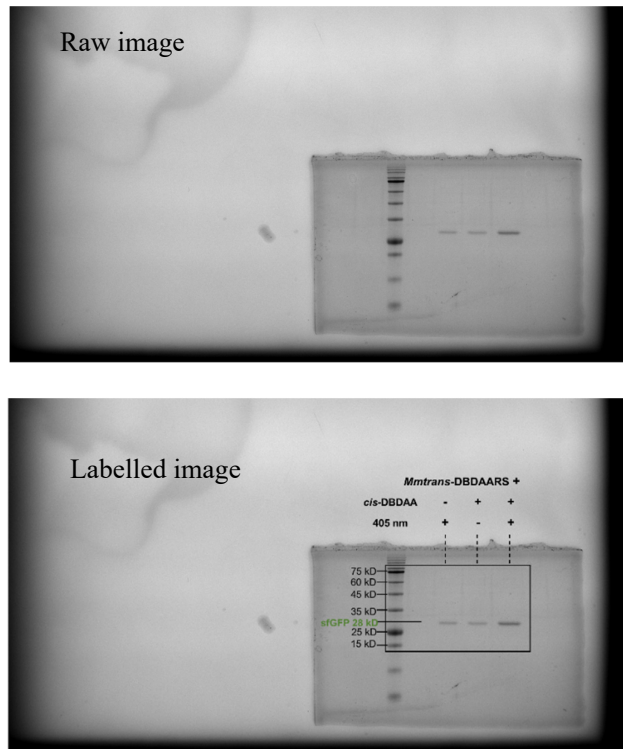

**Figure 4d-1.** The raw image for the SDS-PAGE imaging analysis of purified sfGFP-N149TAG expressed in the presence of 405 nm photo-stimulation without *cis*-DBDAA or in the presence of 2 mM *cis*-DBDAA in dark or in the presence of 405 nm photo-stimulation with 2 mM *cis*-DBDAA added, followed by Coomassie blue staining.

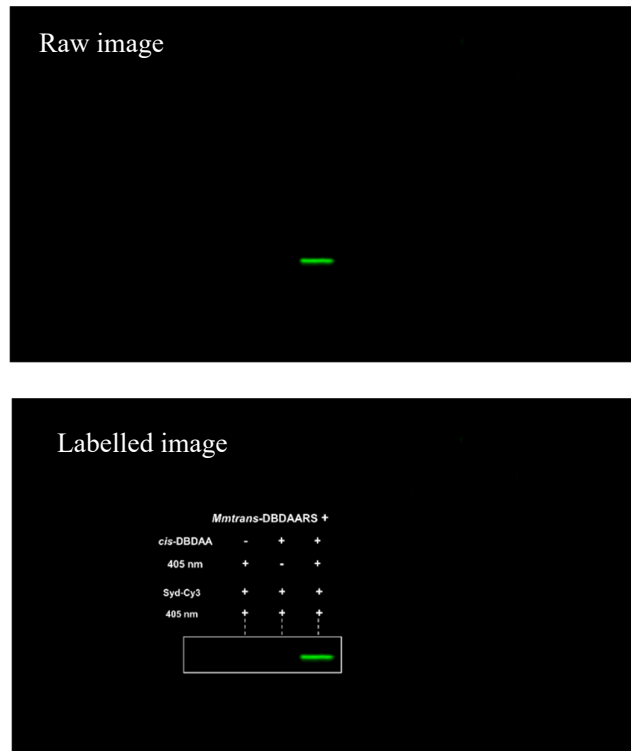

**Figure 4d-2.** The raw image for the in-gel fluorescence analysis after the photo-click decoration on purified sfGFP-N149TAG expressed in the presence of 405 nm photo-stimulation without *cis*-DBDAA, in the presence of 2 mM *cis*-DBDAA in dark or in the presence of 405 nm photo-stimulation with 2 mM *cis*-DBDAA added. The photo-click reaction conditions: 3  $\mu$ M proteins and 30  $\mu$ M Syd-Cy3 in PBS (pH = 7.4), 405 nm LED array ( $13.4 \text{ mW}\cdot\text{cm}^{-2}$ ) for 2 min, followed by resolving and in-gel fluorescence analysis.

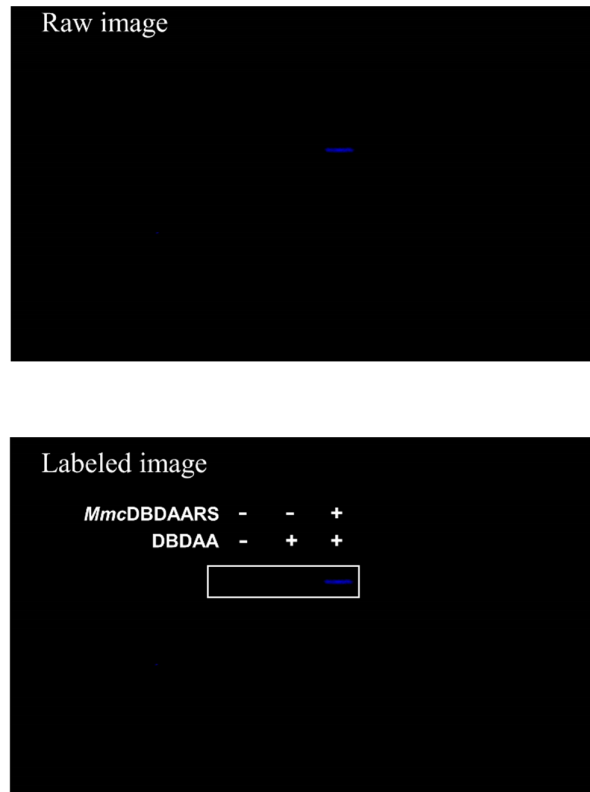

**Figure S12c-1.** The raw fluorescence imaging of the western blot (PVDF membrane) analysis to verify the full-length expression of EGFP. Protein samples were lysed from the HEK293T cells transfected without plasmid or *cis*-DBDAA, with only *pEM*-14E plasmid or with *pEM*-14E plasmid as well as 2 mM *cis*-DBDAA. The PVDF membrane was incubated with the anti-HA-tag mouse monoclonal antibody (1:500), followed by staining with a biotin-labelled Goat Anti-mouse IgG(H+L) secondary antibody (1:1000), which was further rendered as fluorescence bands by a NeutrAvidin Oregon Green™ 488 conjugate.

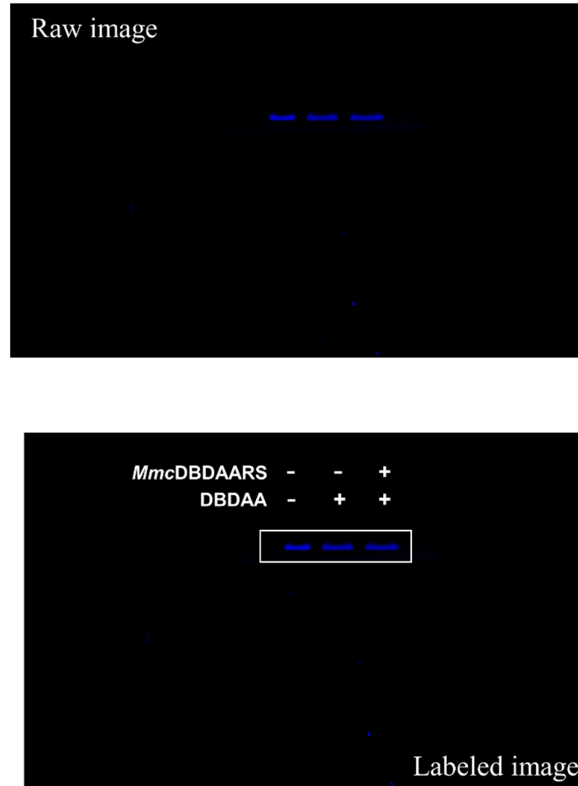

**Figure S12c-2.** The raw fluorescence imaging of the western blot (PVDF membrane) analysis for the  $\beta$ -Actin (housekeeping gene expression) as equal loading controls. Protein samples were lysed from the HEK293T cells transfected without plasmid or *cis*-DBDAA, with only *pEM-14E* plasmid or with *pEM-14E* plasmid as well as 2 mM *cis*-DBDAA. The PVDF membrane was incubated with the anti- $\beta$ -Actin mouse monoclonal antibody (1:1000), followed by staining with a biotin-labeled Goat Anti-mouse IgG(H+L) secondary antibody (1:1000), which was further rendered as fluorescence bands by a NeutrAvidin Oregon Green<sup>TM</sup> 488 conjugate.

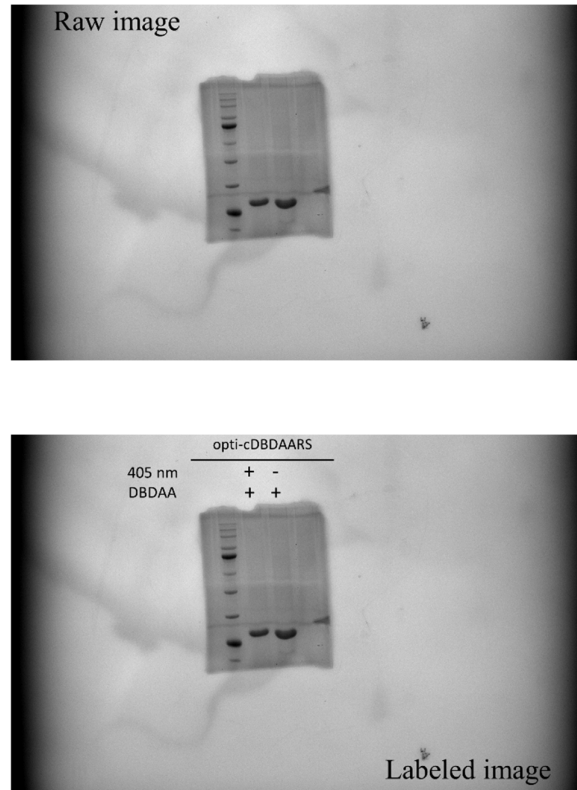

**Figure S20.** The raw image for the SDS-PAGE imaging for the purified sfGFP-Q204DBDAA expressed in the presence or absence of 405 nm stimulation. (Condition: 2.0 mM *cis*-DBDAA), followed by Coomassie blue staining.
